# Supplementary material
Source: HighWire-hosted journal article supplement (https://erj.ersjournals.com/highwire/filestream/113710/field_highwire_adjunct_files/0/ERJ-01763-2012_Disclosures.pdf)
Supplement: ERJ-01763-2012_Disclosures.pdf [file ERJ-01763-2012_Disclosures.pdf]

**I. Blanco** was the recipient of a Research Training Fellowship from the Spanish Society of Pulmonology and Thoracic Surgery (SEPAR).

**J.A. Barberà** has received fees for speaking at conferences and/or consultations from Actelion, Bayer, GSK, Lilly and Pfizer; and his institution has received research funds from Actelion, Bayer, GSK, Lilly and Pfizer.
